# Supplementary material for: Molecular dynamics simulations of the lyotropic reverse hexagonal (HII) of Guerbet branched-chain β-d-glucoside
Source: Royal Society of Chemistry journal article supplement (doi:10.1039/c3cp52385c), 2013-10-18
Supplement: c3cp52385c.pdf [file c3cp52385c.pdf]

## Molecular Dynamics Simulation of Lyotropic Reverse Hexagonal ( $H_{II}$ ) of Guerbet Branched-Chain $\beta$ -D-Glucoside

*Hockseng Nguan<sup>a,b</sup>, Sara Ahmadi<sup>a</sup> and Rauzah Hashim<sup>a</sup>*

<sup>a</sup>Chemistry Department, Faculty of Science, University of Malaya, 50603 Kuala Lumpur, Malaysia

<sup>b</sup>Kavli Institute of Theoretical Physics China, Chinese Academy of Sciences, Beijing 100190, China

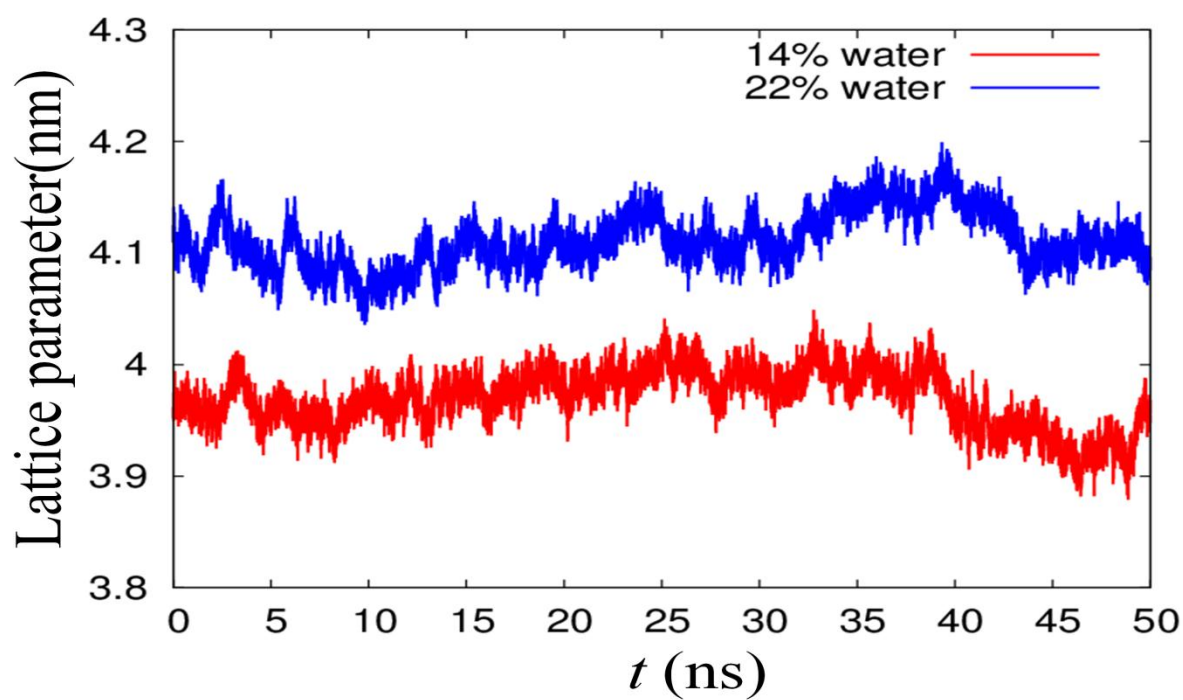

Fig. S1 The time evolution of lattice parameters for the two systems.

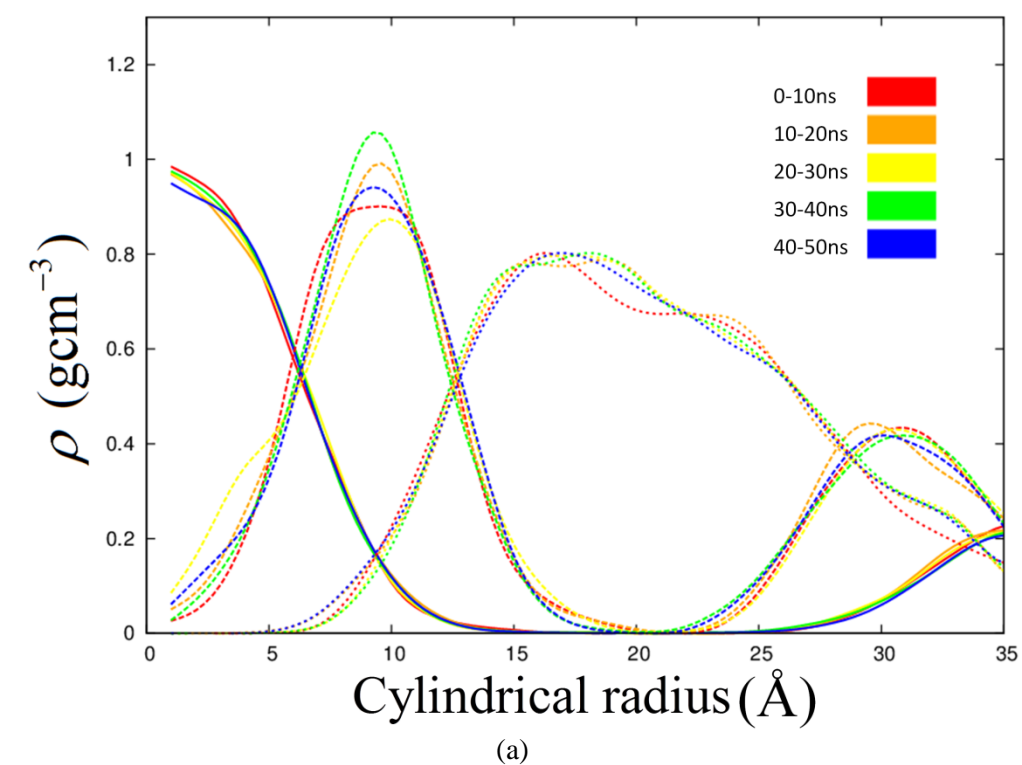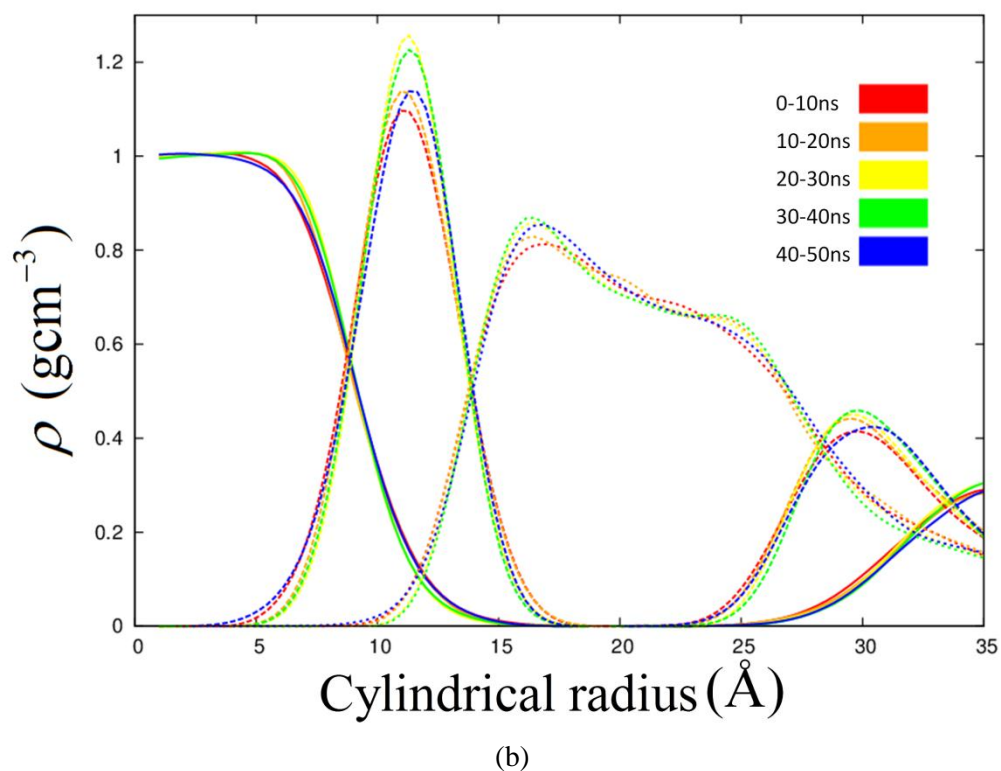

Fig. S2 The radial density profiles of 10 ns block averages for the systems of (a) 14%, and (b) 22%. The solid lines denote the water densities, the dashed lines denote the sugar head densities, and the dotted lines denote the alkyl chain densities.
